# Supplementary material for: A New Benzofuran Derivative from Flemingia philippinensis Merr. et Rolfe
Source: PubMed Central journal article supplement (PMC6268854; doi:10.3390/molecules17077637), 2012-06-25
Supplement: molecules-17-07637-s001.pdf [file molecules-17-07637-s001.pdf]

## Supplementary Materials

### NMR data of compounds 2–11

**Table 1.**  $^{13}\text{C}$ -NMR (125 MHz) and  $^1\text{H}$ -NMR (500 MHz) data of **2**, **3** in  $\text{CDCl}_3$ .

| Position | 2     |                                              | 3     |                                              |
|----------|-------|----------------------------------------------|-------|----------------------------------------------|
|          | C     | H                                            | C     | H                                            |
| 2        | 78.5  | 5.33 dd (3.0, 12.5)                          | 79.5  | 5.33 dd (3.0, 13)                            |
| 3        | 43.0  | 2.80 dd (3.0, 17.0),<br>3.03 dd (12.5, 17.0) | 44.2  | 2.79 dd (3.0, 17.0),<br>3.05 dd (12.5, 17.0) |
| 4        | 196.8 |                                              | 197.8 |                                              |
| 5        | 156.5 |                                              | 160.4 |                                              |
| 6        | 108.7 |                                              | 108.5 |                                              |
| 7        | 160.1 |                                              | 162.8 |                                              |
| 8        | 102.8 |                                              | 106.5 |                                              |
| 9        | 159.4 |                                              | 158.8 |                                              |
| 10       | 102.6 |                                              | 103.7 |                                              |
| 1'       | 130.6 |                                              | 131.7 |                                              |
| 2'       | 127.6 | 7.32 dd (3.0, 8.0)                           | 113.8 | 7.20 d (2.5)                                 |
| 3'       | 115.5 | 6.87 dd (3.0, 8.0)                           | 144.8 |                                              |
| 4'       | 156.1 |                                              | 145.6 |                                              |
| 5'       | 115.5 | 6.87 dd (3.0, 8.0)                           | 116.2 | 6.84 d (8.0)                                 |
| 6'       | 127.6 | 7.32 dd (3.0, 8.0)                           | 119.3 | 7.20 dd (2.0, 8.0)                           |
| 1''      | 115.5 | 6.64 d (10.0)                                | 21.9  | 3.31 d (7.0)                                 |
| 2''      | 126.0 | 5.50 d (10.0)                                | 122.0 | 5.22 t (7.0)                                 |
| 3''      | 78.2  |                                              | 134.9 |                                              |
| 4''      | 28.3  | 1.45 s                                       | 17.9  | 1.73 s                                       |
| 5''      | 28.3  | 1.45 s                                       | 25.8  | 1.73 s                                       |
| 1'''     | 21.4  | 3.20 d (7.0)                                 | 21.3  | 3.38 d (7.0)                                 |
| 2'''     | 122.4 | 5.15 t (7.0)                                 | 121.6 | 5.33 t (7.0)                                 |
| 3'''     | 131.1 |                                              | 134.3 |                                              |
| 4'''     | 17.8  | 1.45 s                                       | 17.9  | 1.79 s                                       |
| 5'''     | 25.7  | 1.47 s                                       | 25.8  | 1.79 s                                       |
| -OH      |       | 12.24 br s                                   |       | 5.97 br s; 6.02 br s                         |

**Table 2.**  $^{13}\text{C}$ -NMR (125 MHz) and  $^1\text{H}$ -NMR (500 MHz) data of **4**, **5** and **6** in in  $\text{CD}_3\text{OD}$ .

| Position          | 4                  |       | 5            |       | 6            |       |
|-------------------|--------------------|-------|--------------|-------|--------------|-------|
|                   | H                  | C     | H            | C     | H            | C     |
| 2                 | 8.03 s             | 155.3 | 8.09 s       | 155.6 | 8.06 s       | 155.5 |
| 3                 |                    | 125.3 |              | 132.5 |              | 130.5 |
| 4                 |                    | 182.8 |              | 181.0 |              | 181.0 |
| 5                 |                    | 164.4 |              | 166.5 |              | 161.5 |
| 6                 | 6.20 d (1.0)       | 100.6 | 6.34 d (2.5) | 99.7  | 6.21 d (2.5) | 100.7 |
| 7                 |                    | 166.4 |              | 168.0 |              | 166.0 |
| 8                 | 6.33 d (1.0)       | 95.3  | 6.51 d (2.5) | 93.8  | 6.32 d (2.5) | 95.3  |
| 9                 |                    | 160.2 |              | 164.3 |              | 161.5 |
| 10                |                    | 106.8 |              | 117.5 |              | 116.5 |
| 1'                |                    | 123.8 |              | 125.0 |              | 125.0 |
| 2'                | 7.36 dd (2.0, 7.0) | 131.9 | 7.37 d (9.0) | 131.9 | 7.46 d (9.0) | 131.9 |
| 3'                | 6.83 dd (2.0, 7.0) | 116.8 | 6.84 d (9.0) | 116.8 | 6.84 d (9.0) | 115.4 |
| 4'                |                    | 159.3 |              | 169.1 |              | 159.0 |
| 5'                | 6.83 dd (2.0, 7.0) | 116.8 | 6.84 d (9.0) | 116.8 | 6.84 d (9.0) | 115.4 |
| 6'                | 7.36 dd (2.0, 7.0) | 131.9 | 7.37 d (9.0) | 131.9 | 7.46 d (9.0) | 131.9 |
| -OCH <sub>3</sub> |                    |       | 3.87 s       | 56.97 | 3.82 s       | 56.26 |

**Table 3.**  $^1\text{H}$ -NMR (500 MHz) and  $^{13}\text{C}$ -NMR (125 MHz) data of **7**, **8**, **9**, **10** and **11**.

| Position          | <b>7</b><br>( $\text{CD}_3\text{OD}$ ) |       | <b>8</b><br>( $\text{CD}_3\text{OD}$ ) |       | <b>9</b><br>( $\text{CD}_3\text{OD}$ ) |       | <b>10</b><br>( $\text{CD}_3\text{OD}$ ) |       | <b>11</b><br>(DMSO)   |       |
|-------------------|----------------------------------------|-------|----------------------------------------|-------|----------------------------------------|-------|-----------------------------------------|-------|-----------------------|-------|
|                   | H                                      | C     | H                                      | C     | H                                      | C     | H                                       | C     | H                     | C     |
| 2                 | 8.14                                   | 155.7 | 8.13 s                                 | 154.8 | 8.14 s                                 | 154.0 | 8.14 s                                  | 154.1 | 8.42 s                | 154.8 |
| 3                 |                                        | 125.2 |                                        | 124.7 |                                        | 123.2 |                                         | 124.9 |                       | 122.7 |
| 4                 |                                        | 182.6 |                                        | 180.6 |                                        | 180.9 |                                         | 181.0 |                       | 180.6 |
| 5                 |                                        | 163.7 |                                        | 162.8 |                                        | 162.2 |                                         | 162.3 |                       | 161.8 |
| 6                 | 6.49 d (2.5)                           | 101.3 | 6.51 d (2.0)                           | 100.0 | 6.52 d (2.0)                           | 100.9 | 6.35 d (2.0)                            | 100.3 | 6.46 d (1.5)          | 100.1 |
| 7                 |                                        | 164.9 |                                        | 164.2 |                                        | 166.0 |                                         | 163.4 |                       | 163.2 |
| 8                 | 6.67 d (2.0)                           | 96.1  | 6.69 d (2.0)                           | 94.7  | 6.69 d (2.0)                           | 94.5  | 6.50 d (2.0)                            | 92.0  | 6.82 d (1.5)          | 94.7  |
| 9                 |                                        | 159.4 |                                        | 157.7 |                                        | 158.2 |                                         | 159.9 |                       | 157.6 |
| 10                |                                        | 108.2 |                                        | 106.8 |                                        | 106.8 |                                         | 105.7 |                       | 106.2 |
| 1'                |                                        | 114.1 |                                        | 122.1 |                                        | 123.0 |                                         | 123.4 |                       | 121.1 |
| 2'                | 7.16 d (1.0)                           | 123.1 | 7.06 d (1.5)                           | 116.2 | 7.48 d (8.5)                           | 129.9 | 7.48 d (9.0)                            | 129.9 | 7.38 d (8.0)          | 130.3 |
| 3'                |                                        | 149.0 |                                        | 150.6 | 6.97 d (9.0)                           | 113.5 | 6.98 d (9.0)                            | 116.4 | 6.82 d (8.0)          | 115.2 |
| 4'                |                                        | 148.2 |                                        | 157.4 |                                        | 157.9 |                                         | 157.8 |                       | 157.4 |
| 5'                | 6.84 d (8.5)                           | 123.7 | 6.86 d (8.0)                           | 116.2 | 6.97 d (9.0)                           | 113.5 | 6.98 d (9.0)                            | 116.4 | 6.82 d (8.0)          | 115.2 |
| 6'                | 6.96 dd (1.5, 8.0)                     | 116.4 | 6.99 dd (2.0, 8.0)                     | 130.6 | 7.48 d (8.5)                           | 129.9 | 7.48 d (9.0)                            | 129.9 | 7.38 d (8.0)          | 130.3 |
| 1''               | 5.02 d (7.5)                           | 101.8 | 5.07 t (6.5)                           | 100.7 | 5.03 t (7.5)                           | 99.8  | 4.95 t (7.5)                            | 97.9  | 5.06 d (7.5)          | 99.7  |
| 2''               |                                        | 74.9  |                                        | 73.7  |                                        | 73.3  |                                         | 73.6  |                       | 73.2  |
| 3''               |                                        | 78.5  |                                        | 77.5  |                                        | 76.8  |                                         | 77.0  |                       | 77.3  |
| 4''               |                                        | 71.4  |                                        | 70.0  |                                        | 69.9  |                                         | 70.0  |                       | 69.8  |
| 5''               |                                        | 78.0  |                                        | 76.9  |                                        | 76.5  |                                         | 76.6  |                       | 76.6  |
| 6''               |                                        | 62.6  |                                        | 61.8  |                                        | 61.1  |                                         | 61.2  |                       | 60.8  |
| 2''~6''           | 3.38~3.91                              |       | 3.40~4.00                              |       | 3.30~4.00                              |       | 3.30~3.91                               |       | 3.10~3.80             |       |
| -OH               |                                        |       |                                        |       | 3.82 s                                 | 54.4  | 3.87 s                                  | 55.1  | 12.92 br s; 9.53 br s |       |
| -OCH <sub>3</sub> | 3.88                                   | 56.7  |                                        |       | 8.14 s                                 | 154.0 | 8.14 s                                  | 154.1 |                       |       |
